# Supplementary material
Source: Research Square preprint supplement (doi:10.21203/rs.3.rs-10146977/v1)
Supplement: Supplementary file 1 [file b64dd5d43326c89e84f46396.docx]

**Supporting Information**

**Transferable diamond tapes for decoupling diamond growth from metal protection**

Linhui Qiana,b, Jiawen Lia, Pengfei Jiaa,b, Xiaotian Xuea, Mingda Liua, Leling Xionga, Yunhan Linga,c,*, Daqiao Mengb,*, Zhengjun Zhanga,c,*

Corresponding Authors: Zhengjun Zhang([zjzhang@tsinghua.edu.cn](mailto:zjzhang@tsinghua.edu.cn)), Daqiao Meng([mengdaqiao@caep.cn](mailto:mengdaqiao@caep.cn)), Yunhan Ling([yhling@mail.tsinghua.edu.cn](mailto:yhling@mail.tsinghua.edu.cn))

*aKey Laboratory of Advanced Materials(MOE), School of Materials Science and Engineering, Tsinghua University, Beijing, 100084, China*

*bInstitute of Materials, China Academy of Engineering Physics, Mianyang 621900, Sichuan Province, China*

*cState Key Laboratory of Metallic Materials for Marine Equipment and Applications, Beijing, China*


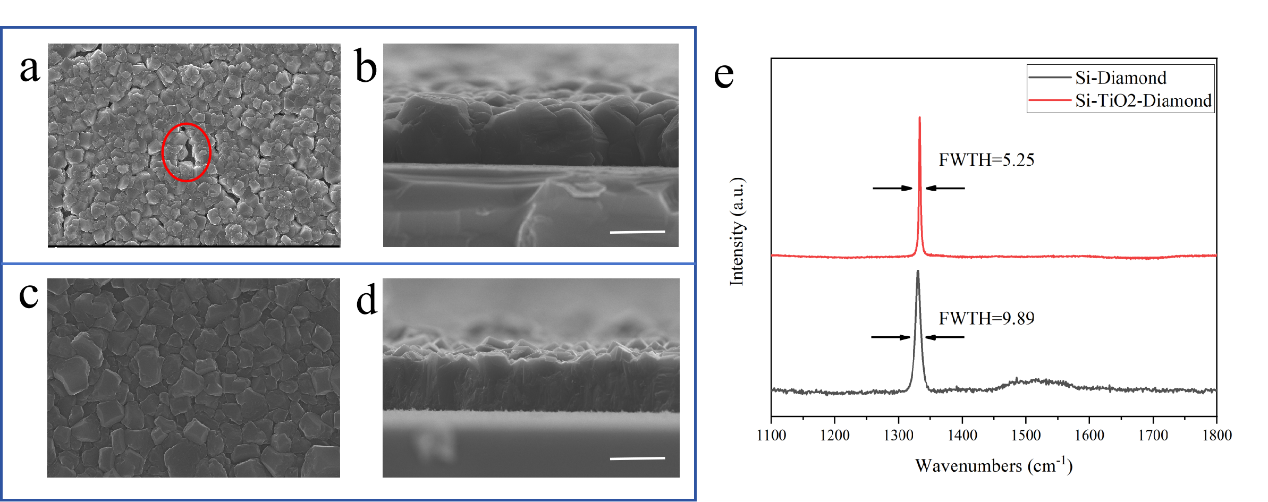


**Fig. S1 | Comparison of diamond growth on flat Si and TiO2 nanorod-modified Si substrates.**
**a,b**, Surface SEM image **a** and cross-sectional SEM image **b** of a diamond film grown directly on a flat Si substrate after 2 h of MPCVD growth. **c, d**, Surface SEM image **c** and cross-sectional SEM image **d** of a diamond film grown on a TiO2 nanorod-modified Si substrate under the same MPCVD growth conditions. **e**, Raman spectra of diamond films grown on flat Si and TiO2 nanorod-modified Si substrates after 2 h of MPCVD growth.


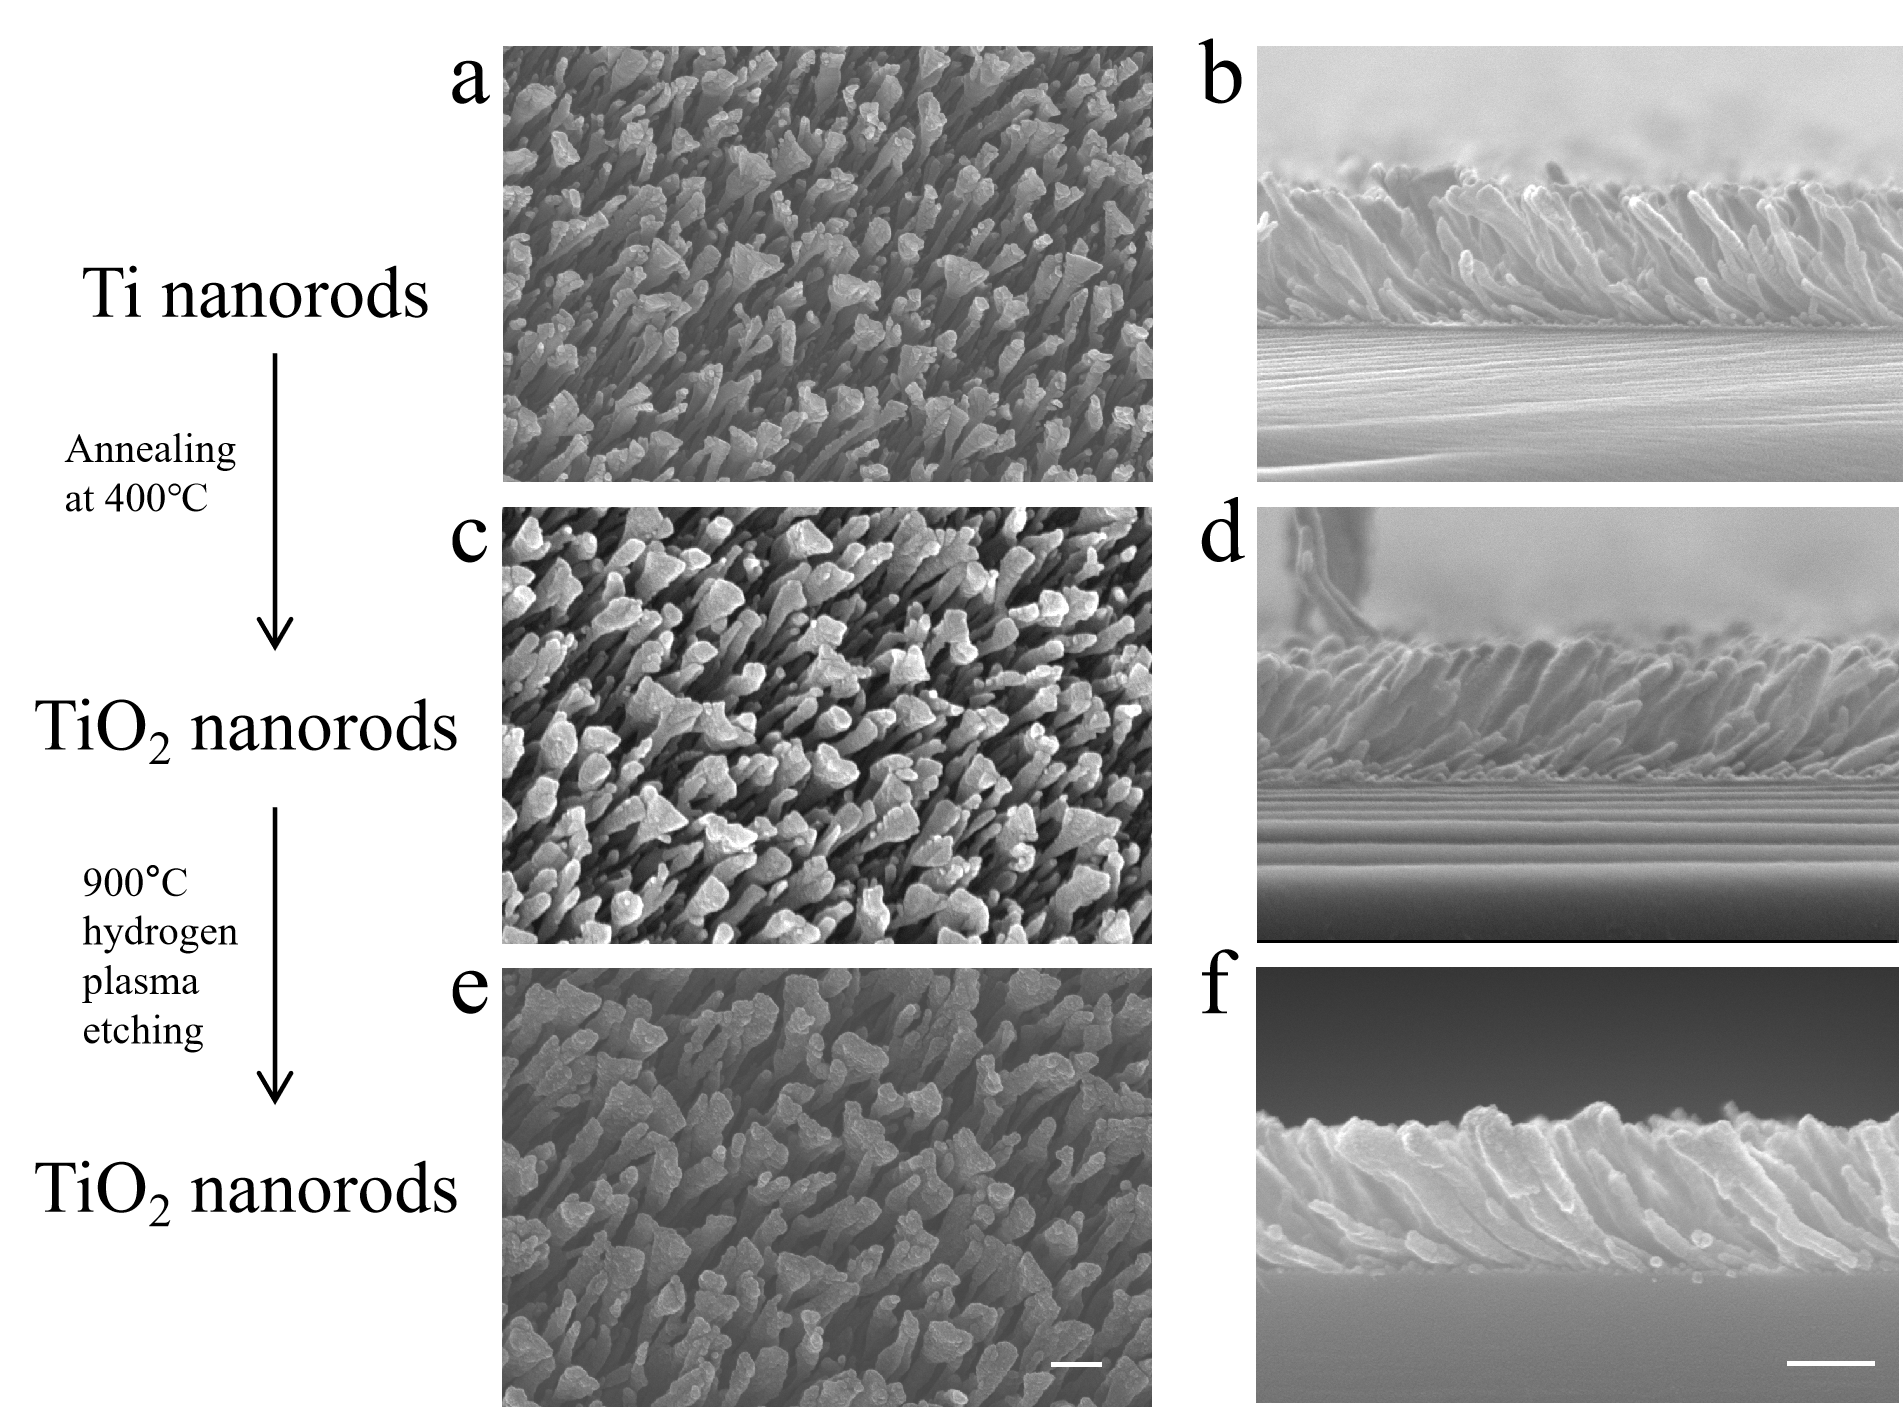


**Fig. S2 | Morphological evolution and plasma stability of GLAD-derived TiO2 nanorod arrays on Si.**
**a, b**, Surface SEM image **a** and cross-sectional SEM image **b** of Ti nanorod arrays grown on Si substrates by glancing angle deposition. **c, d**, Surface SEM image **c** and cross-sectional SEM image **d** of Si@TiO2 nanorods obtained by annealing the Si@Ti nanorods in air at 400 °C for 2 h. **e, f**, Surface SEM image **e** and cross-sectional SEM image **f** of Si@TiO2 nanorods after treatment in a hydrogen plasma environment at 900 °C for 30 min in the MPCVD system.


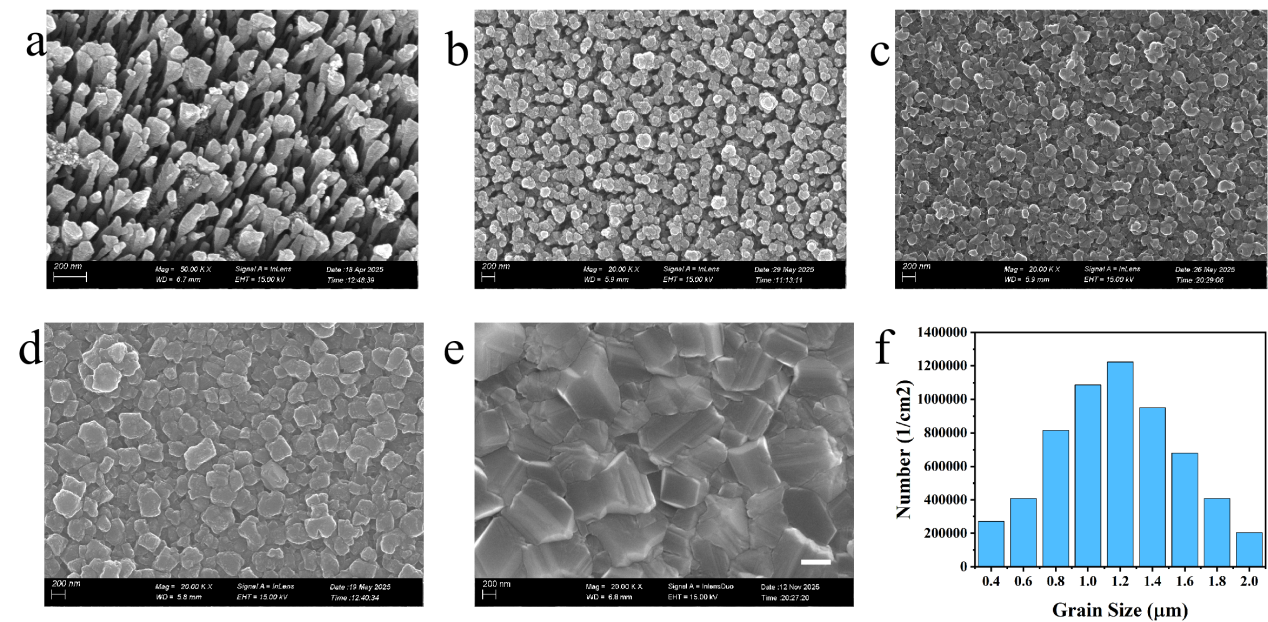


**Fig. S3 | Time-dependent MPCVD growth of polycrystalline diamond films on Si@TiO2 nanorod substrates.**
**a**, Surface SEM image of Si@TiO2 nanorods after spin coating with a diamond microparticle suspension. **b–e**, Surface SEM images showing the morphological evolution of diamond growth on Si@TiO2 nanorod substrates after MPCVD growth for **b** 3 mins, **c** 10 mins, **d** 20 mins and **e** 120 mins. **f**, Grain size distribution of the polycrystalline diamond film after 2 h of MPCVD growth, showing that the film is composed of microscale diamond grains with a broad size distribution.


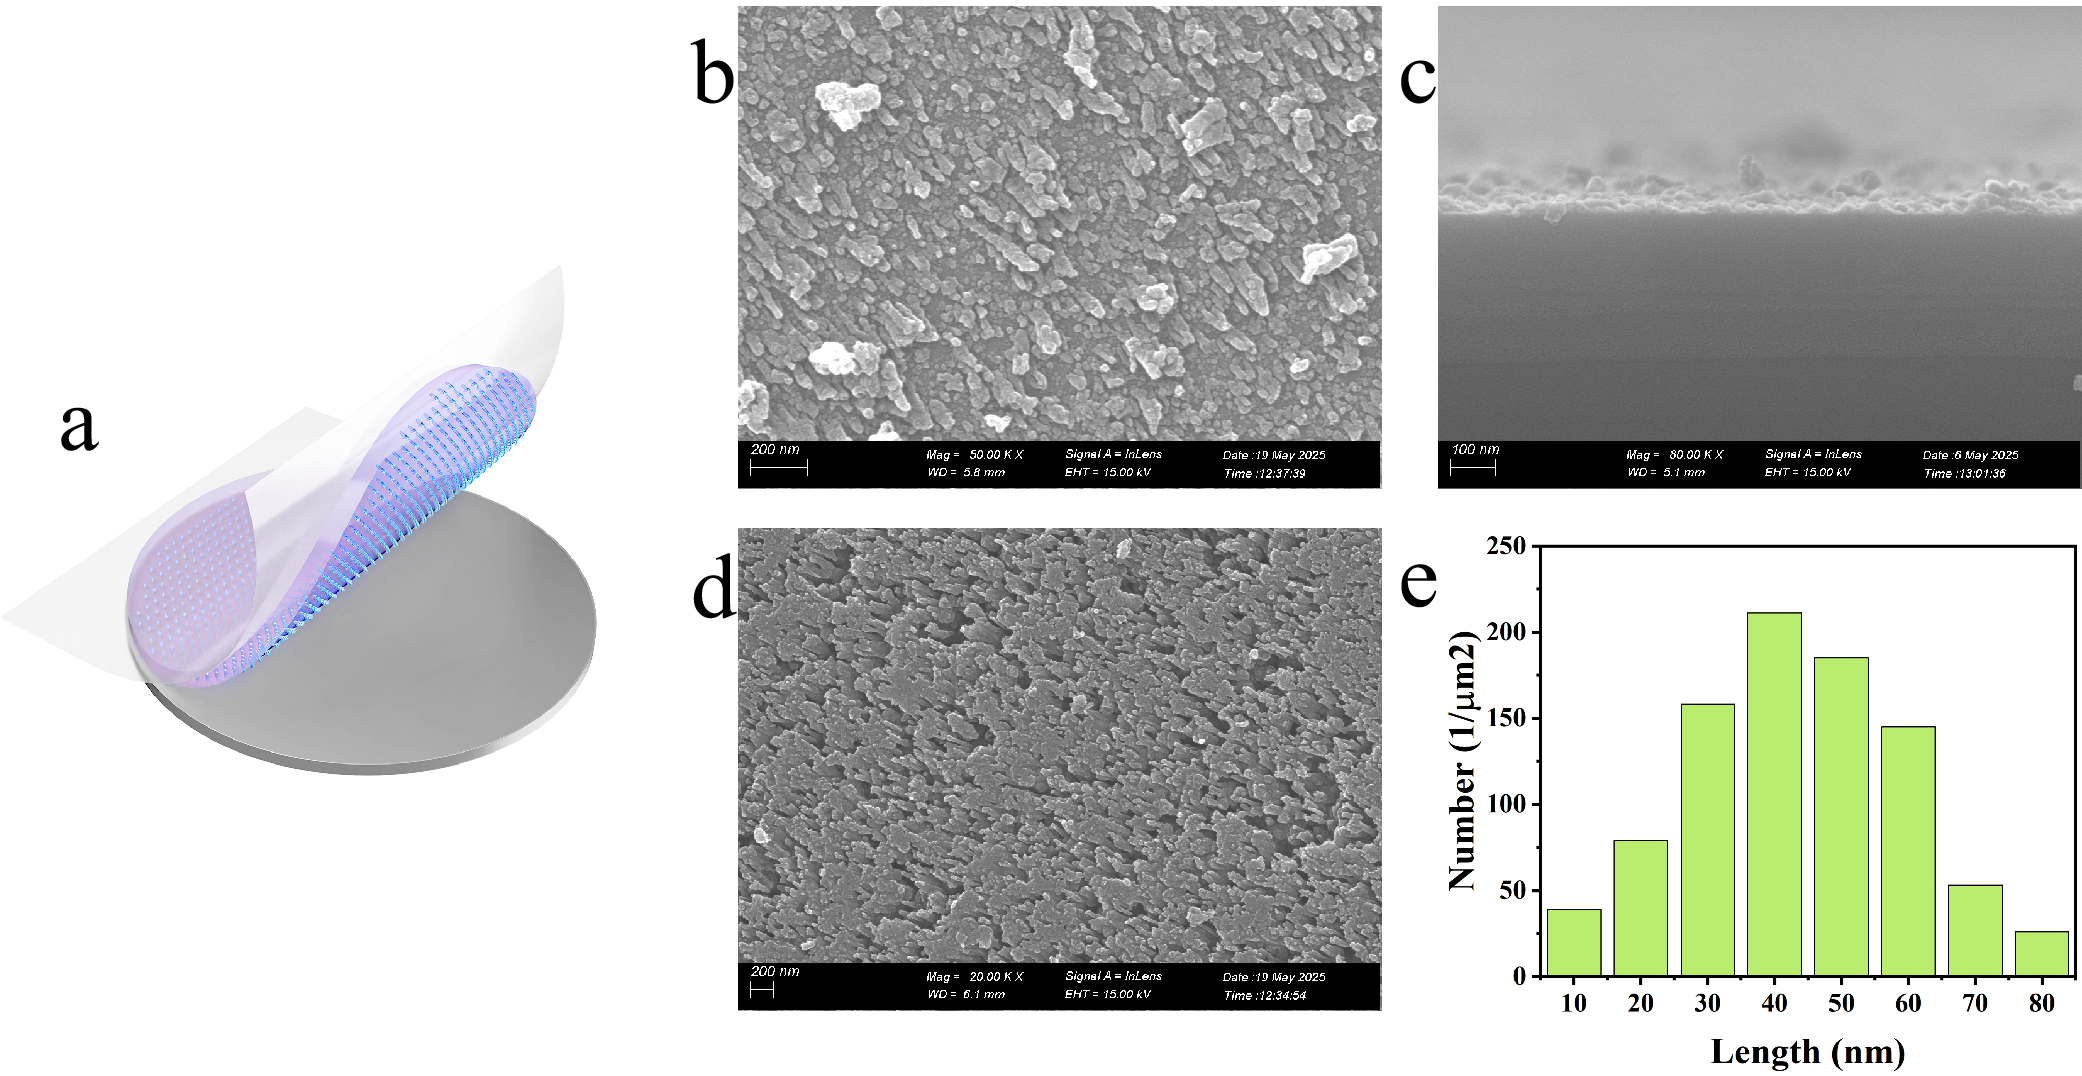


**Fig. S4 | Release behavior of polycrystalline diamond films from Si@TiO2 nanorod growth substrates.**
**a**, Schematic illustration of the peeling process of Si@TiO2@diamond using graphene thermal release tape. **b**, Surface SEM image of the Si substrate after diamond film release, showing residual TiO2 nanorod fragments on the substrate surface. **c**, Cross-sectional SEM image of the Si substrate after peeling, confirming that the release occurs within the TiO2 nanorod interlayer rather than through the diamond film. **d**, SEM image of the embedded side of the released diamond film, revealing nanorod-related interfacial features retained on the backside of the film after delamination. **e**, Statistical analysis of the residual TiO2 nanorod length on the Si substrate after peeling.


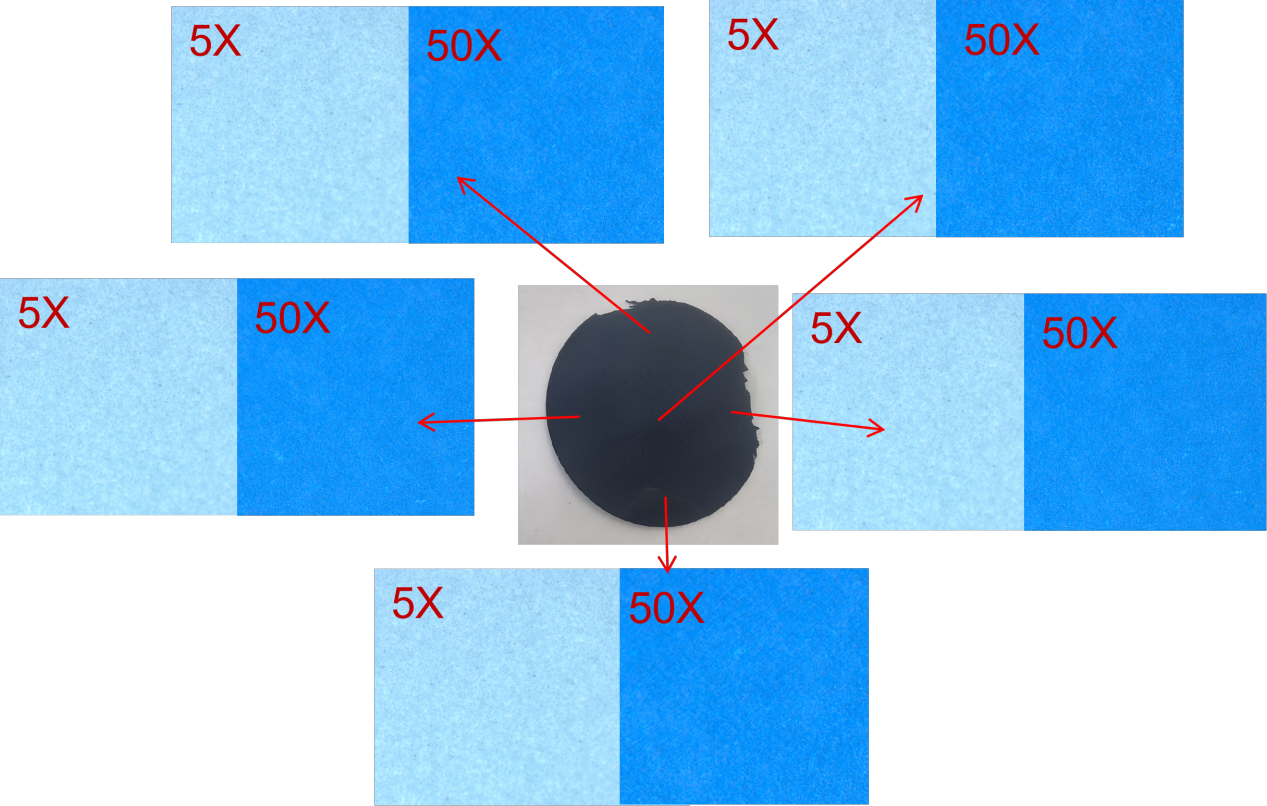


**Fig. S5 | Optical characterization of the released 3-inch polycrystalline diamond film.**
Optical microscopy images of the released 3-inch polycrystalline diamond film collected from different regions at 5× and 50× magnifications. The low-magnification images show large-area uniformity across the released film, while the high-magnification images further confirm the absence of obvious cracks, tearing or discontinuities. These results demonstrate that the TiO2 nanorod-mediated release strategy enables the preparation of large-area polycrystalline diamond films with good continuity and structural integrity


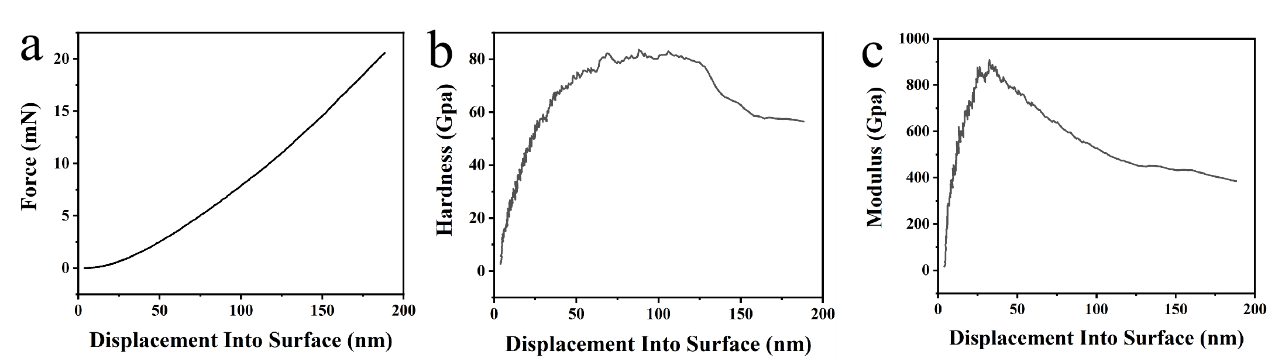


**Fig. S6 | Nanoindentation characterization of the Si@TiO2@diamond sample.**
**a**, Load–displacement curve obtained from nanoindentation testing of the Si@TiO2@diamond sample, showing the variation in applied load as a function of indentation depth during loading and unloading. **b**, Hardness as a function of indentation depth, indicating the depth-dependent mechanical response of the diamond film. **c**, Young’s modulus as a function of indentation depth, showing the corresponding elastic response of the Si@TiO2@diamond sample.


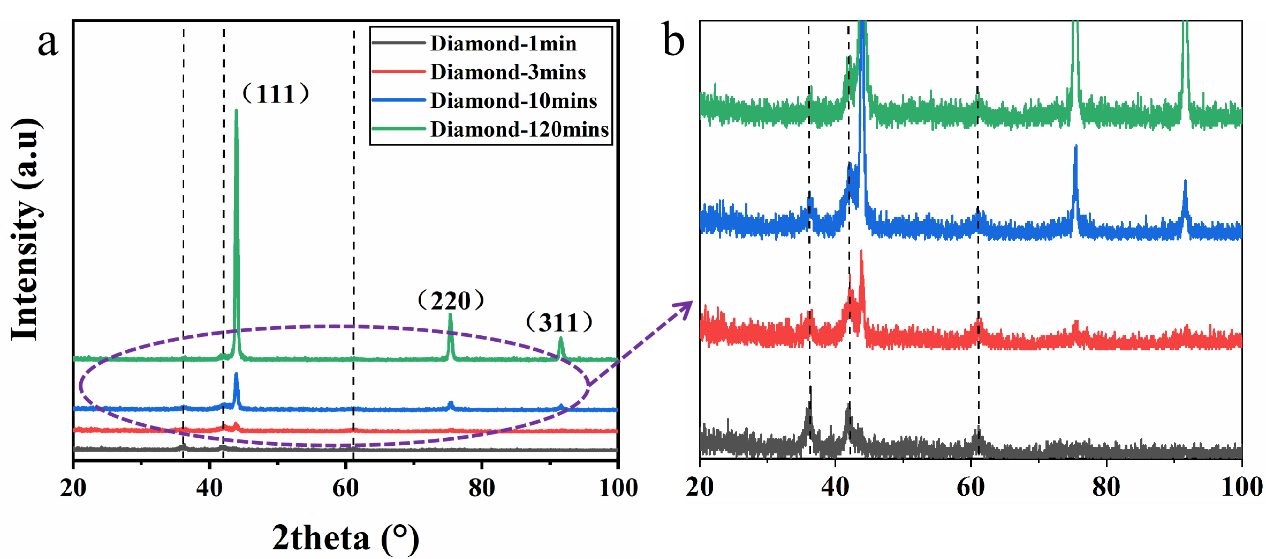


**Fig. S7 | Time-dependent XRD analysis of interfacial phase evolution during MPCVD growth.**
**a**, 2θ XRD patterns of Si@TiO2 nanorod substrates after MPCVD growth for 1 min, 3 mins,10 mins and 120 mins.
**b**, Enlarged XRD patterns of the selected 2θ region highlighted in **a**. The appearance of TiC-related diffraction peaks indicates partial carburization of the TiO2 nanorods during MPCVD growth under the high-temperature hydrogen/methane plasma environment.


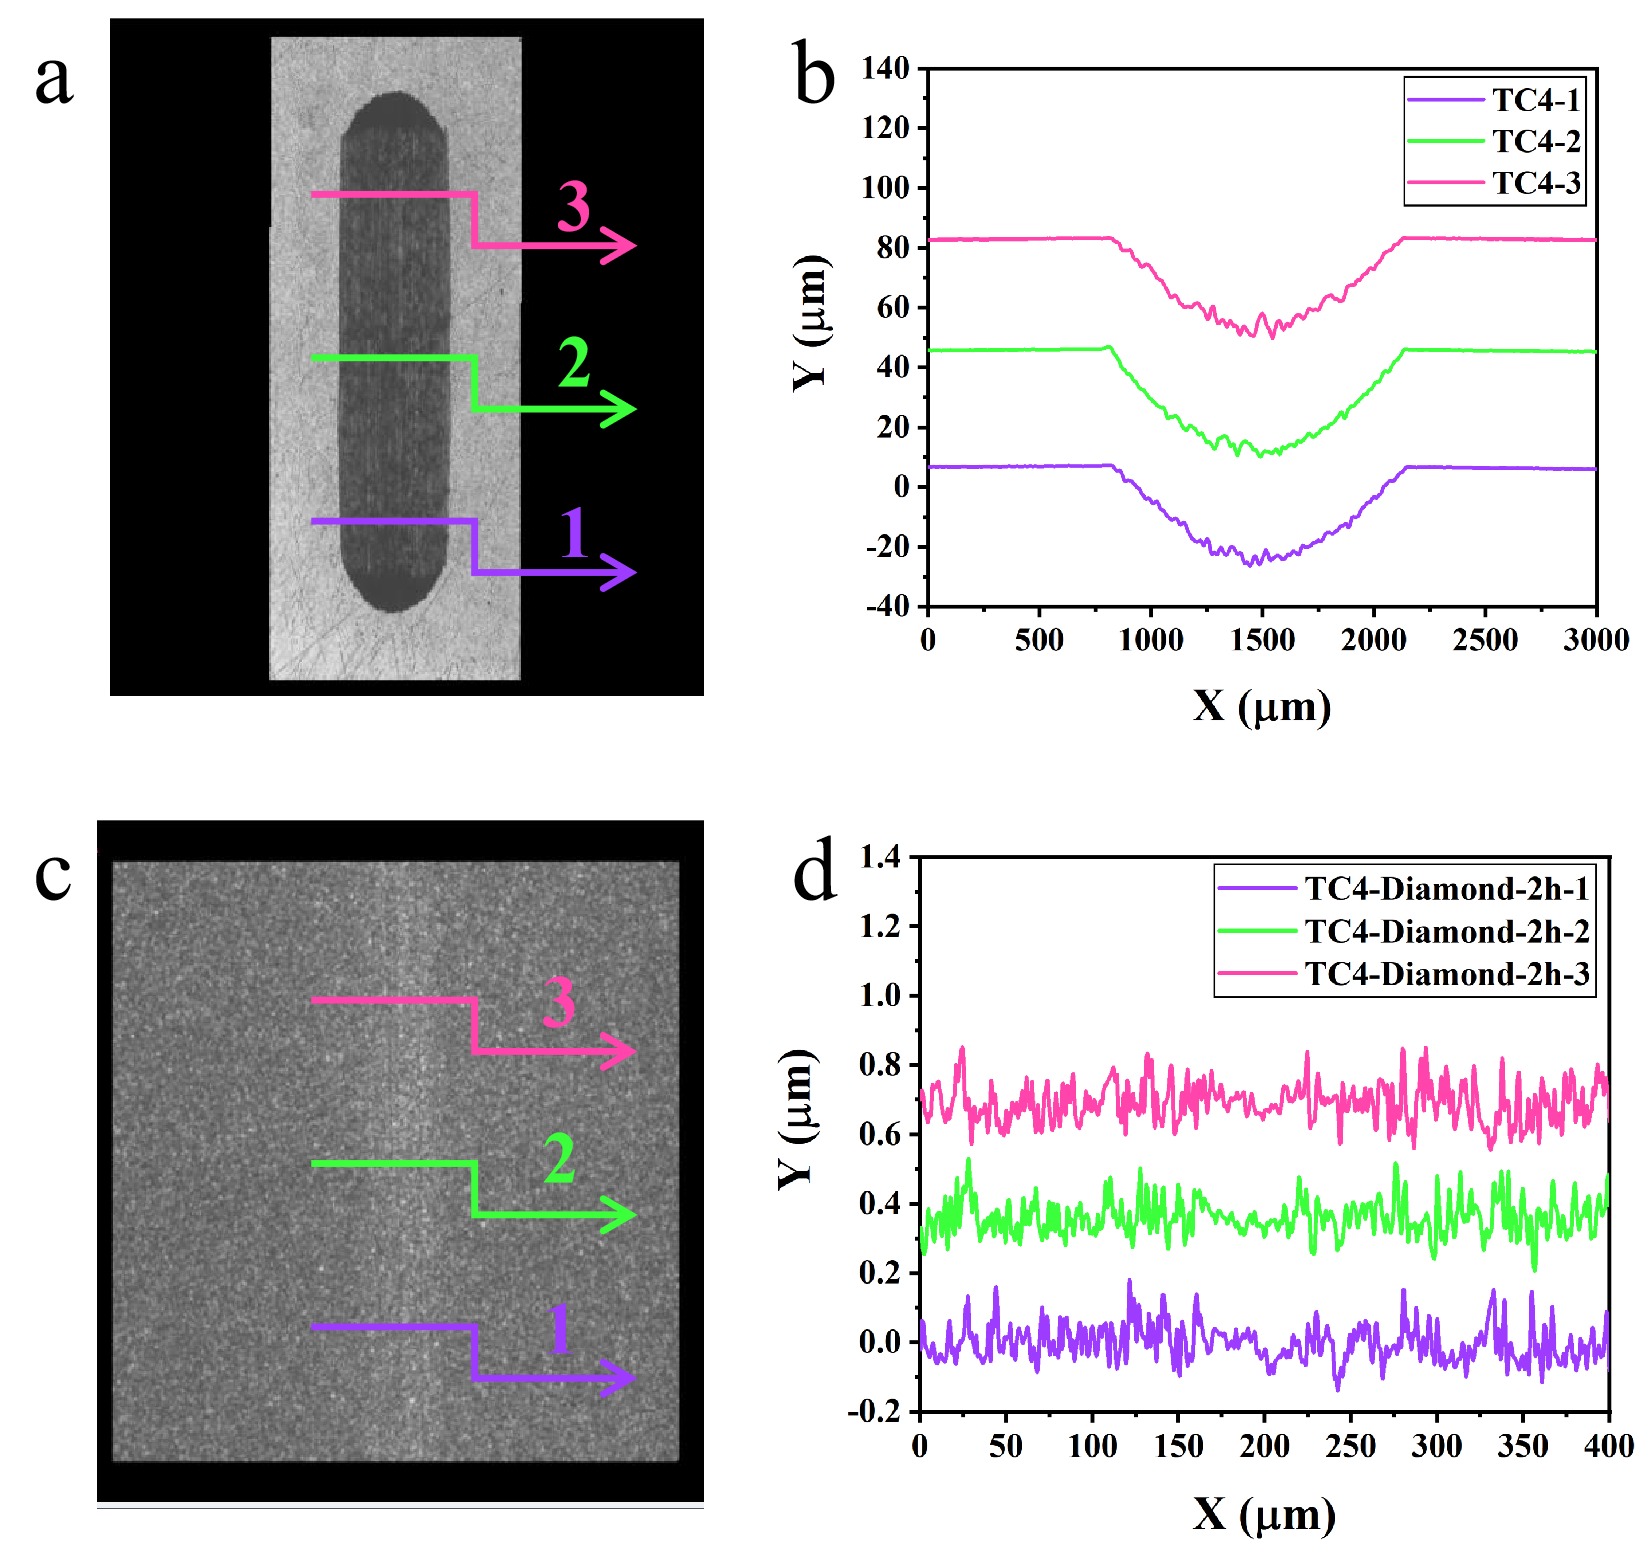


**Fig. S8 | White-light interferometry analysis of wear tracks on bare TC4 and TC4@diamond samples after dry sliding.**

**a**, Three-dimensional white-light interferometry image of the wear track on the bare TC4 titanium alloy substrate after dry sliding. **b**, Cross-sectional height profiles extracted from three representative regions marked in **a**, showing the large wear depth and irregular profile of the worn TC4 surface. **c**, Three-dimensional white-light interferometry image of the wear track on the TC4@diamond sample after dry sliding under the same testing conditions. **d**, Cross-sectional height profiles extracted from three representative regions marked in **c**, confirming the markedly reduced wear depth and improved surface integrity of the TC4@diamond sample.


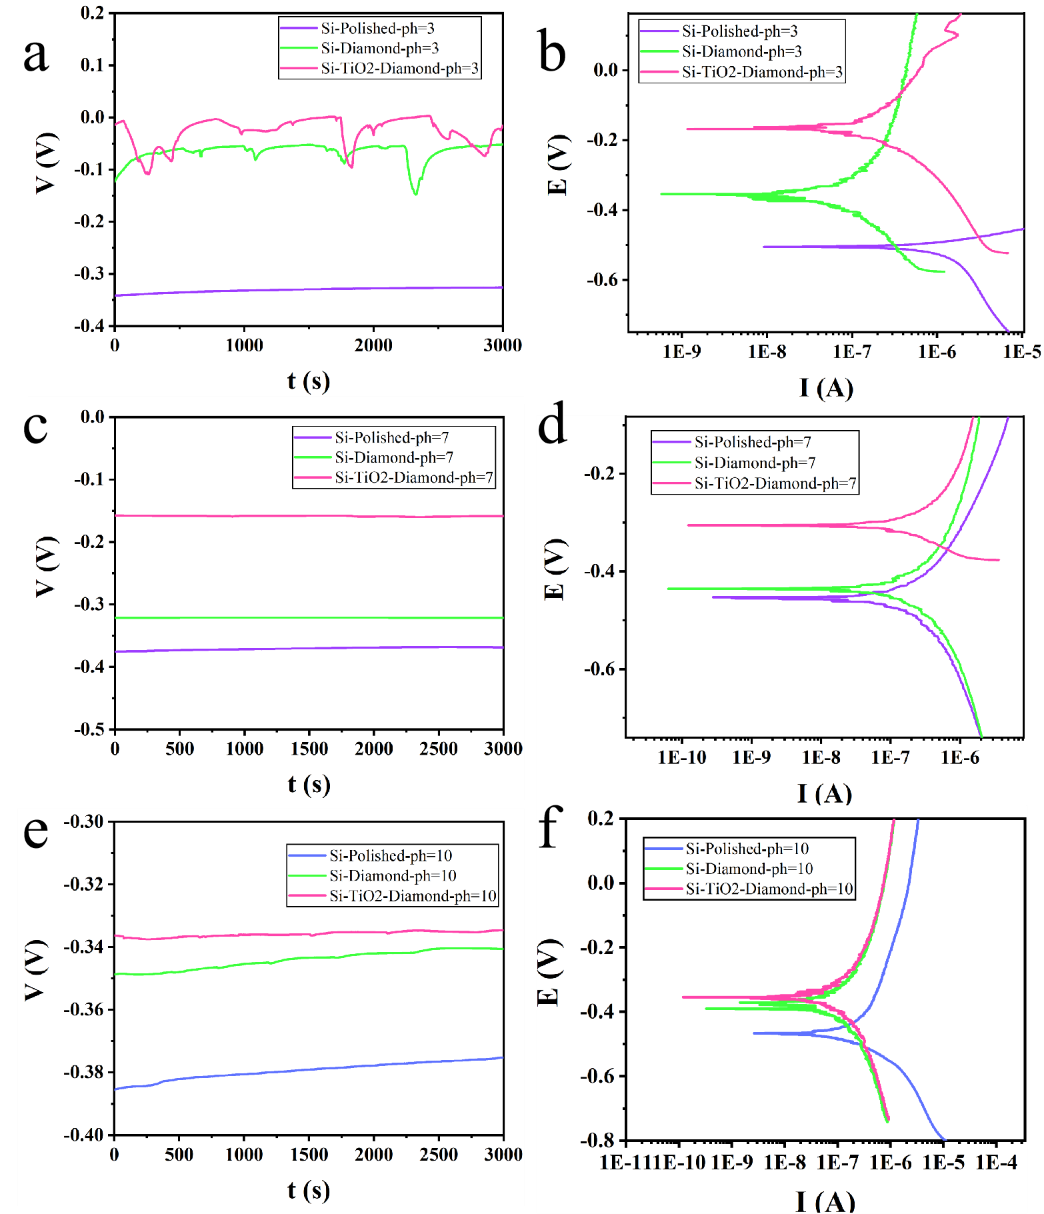


**Fig. S9 | Electrochemical behavior of Si, Si@diamond and Si@TiO2@diamond samples under different pH conditions.**
**a, b**, Open-circuit potential **a** and potentiodynamic polarization **b** curves of Si, Si@diamond and Si@TiO2@diamond samples measured in an electrolyte containing 3.5 wt % NaCl and 0.5 wt % NaF at pH 3. **c, d**, Open-circuit potential **c** and potentiodynamic polarization **d** curves of the corresponding samples measured in the same electrolyte at pH 7. **e, f**, Open-circuit potential **e** and potentiodynamic polarization **f** curves of the corresponding samples measured in the same electrolyte at pH 10.


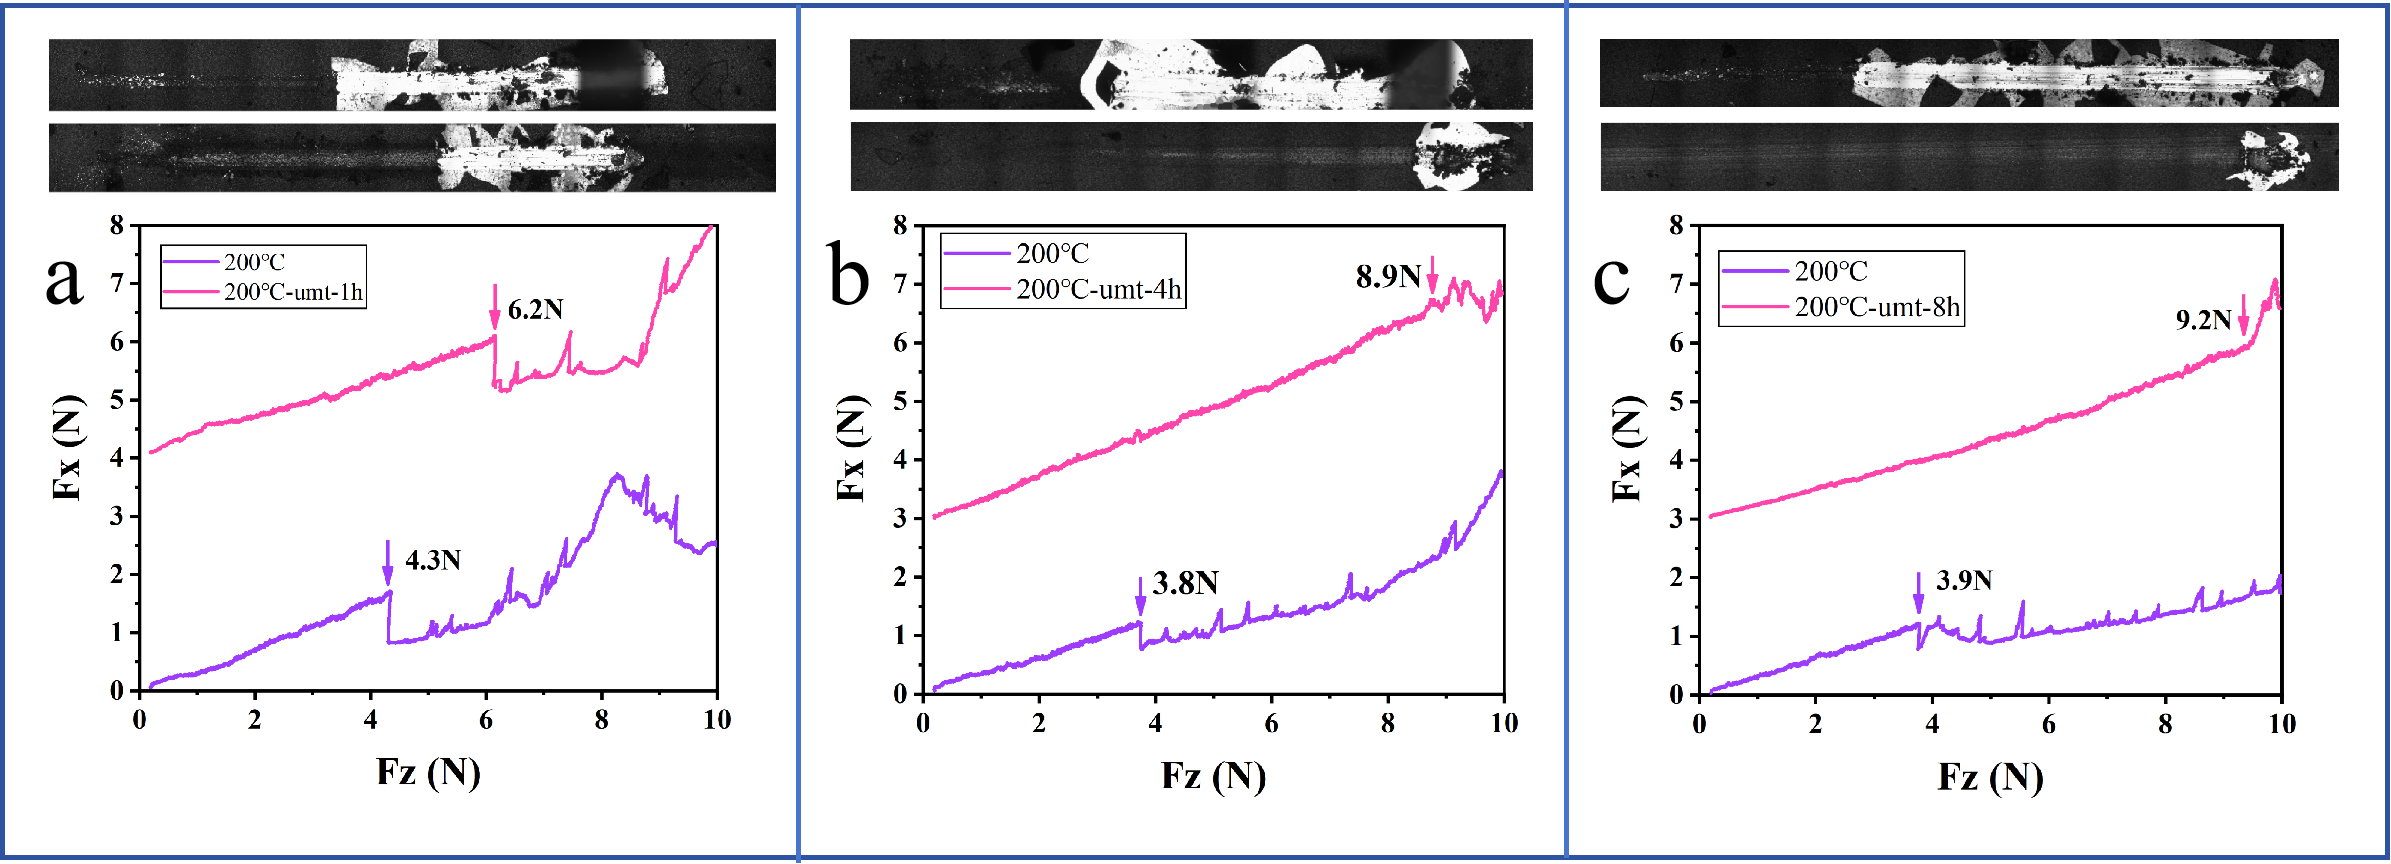


**Fig. S10 | Scratch adhesion evaluation of transferred diamond coatings before and after dry sliding.**
**a**, Scratch adhesion test of sample 1 measured in the unworn region and in the region subjected to 1 h of dry sliding. The corresponding confocal microscopy images of the scratch tracks are shown above the adhesion curves, revealing the coating failure position used to determine the critical load. **b**, Scratch adhesion test of sample 2 measured in the unworn region and in the region subjected to 4 h of dry sliding, together with the corresponding confocal microscopy images of the scratch tracks. **c**, Scratch adhesion test of sample 3 measured in the unworn region and in the region subjected to 8 h of dry sliding, together with the corresponding confocal microscopy images of the scratch tracks.


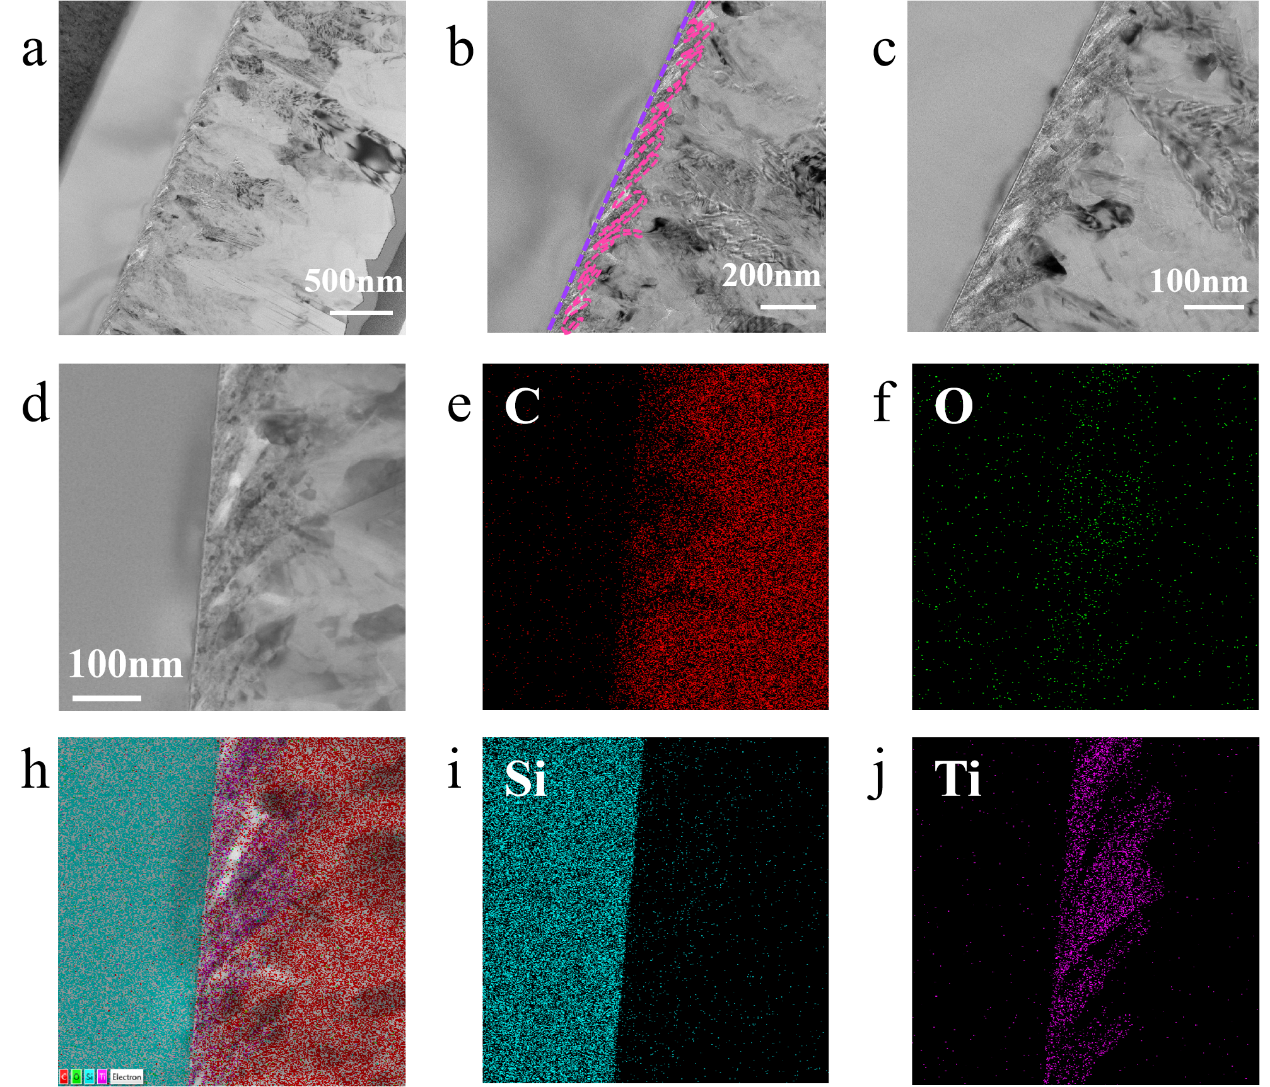


**Fig. S11 | TEM characterization and elemental mapping of the Si@TiO2@diamond interfacial structure.**
**a**, Cross-sectional TEM image of the Si@TiO2@diamond sample, showing the multilayer architecture consisting of the Si substrate, TiO2 nanorod interlayer and overgrown polycrystalline diamond film. **b, c**, Enlarged TEM images of the selected interfacial regions in **a**, revealing the morphology of the TiO2 nanorod layer and its contact with the diamond film and Si substrate. **d–f, h–j**, High-resolution STEM elemental mapping images of the corresponding interfacial regions, showing the spatial distributions of C, O, Ti and Si. The carbon signal is mainly located in the diamond layer, while Ti and O are concentrated in the nanorod interlayer, and Si is confined to the underlying substrate.


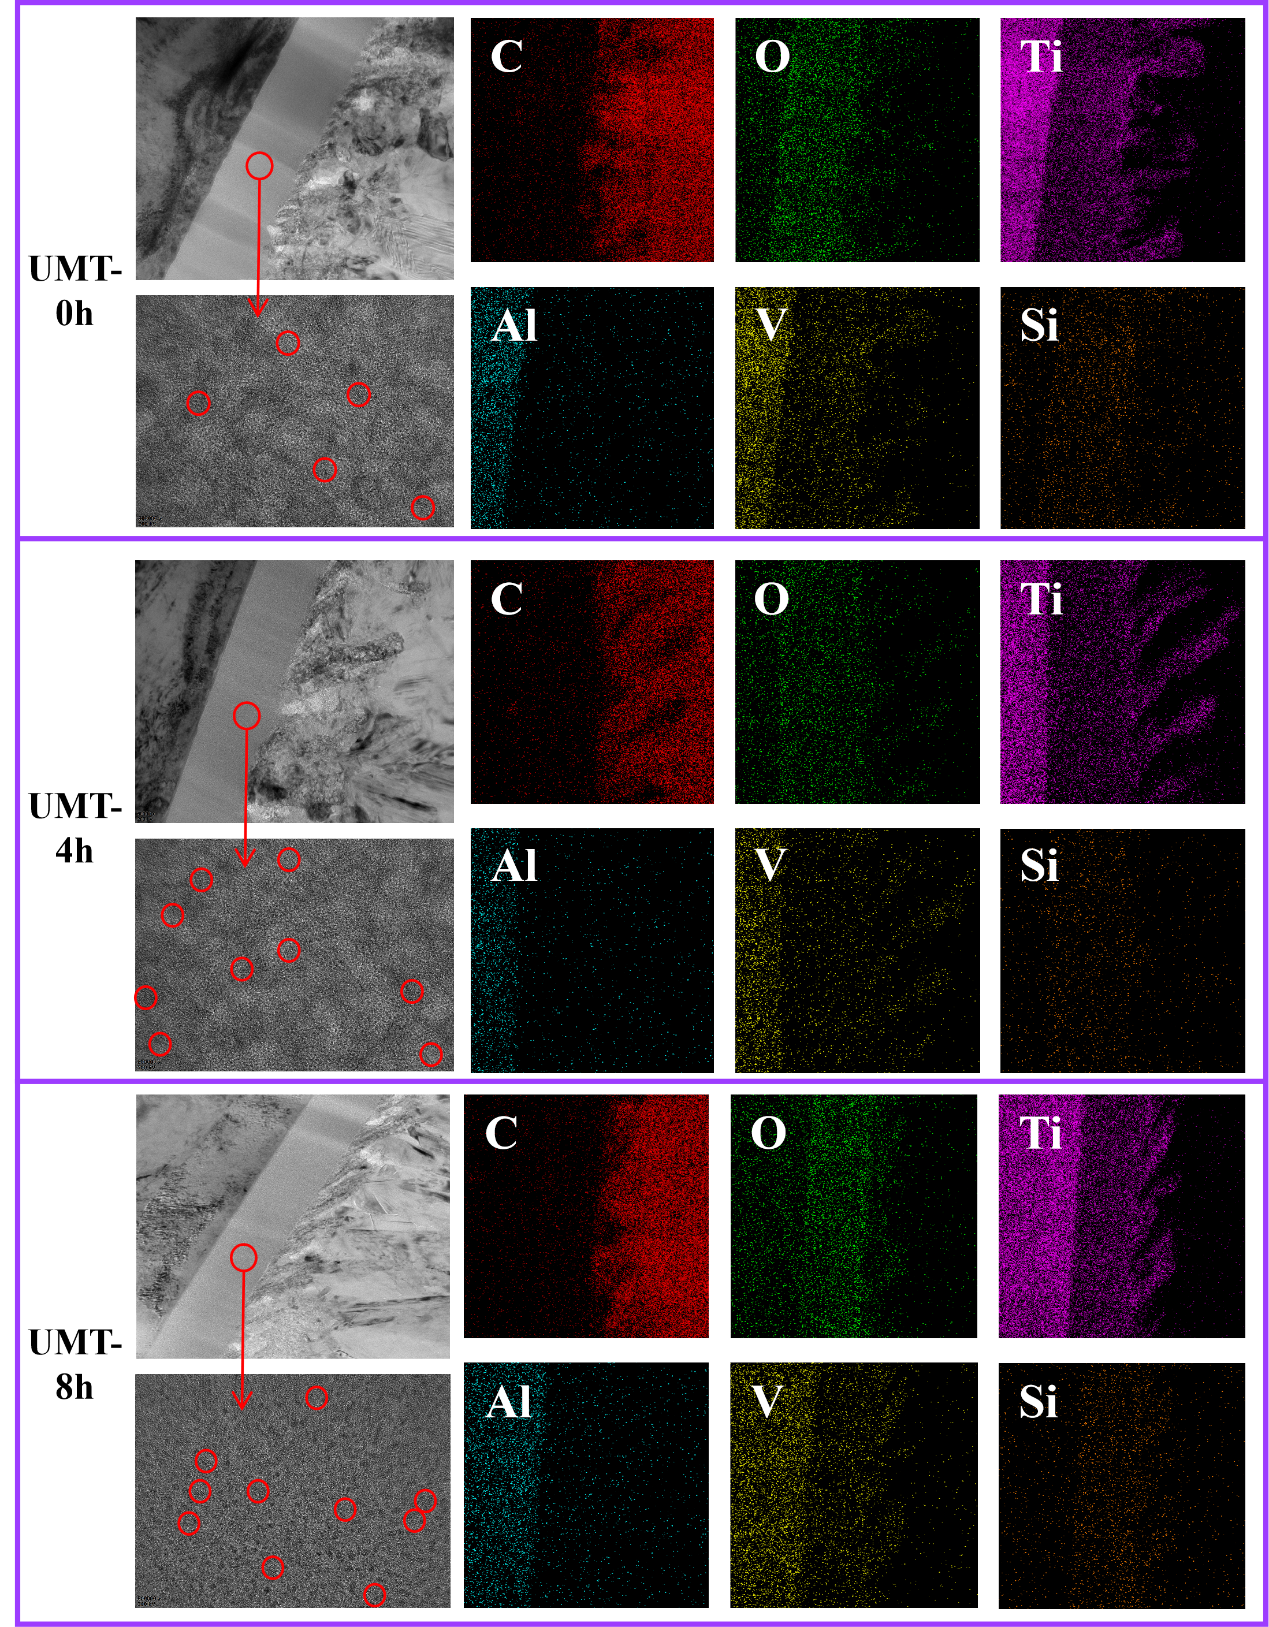


**Fig. S12 | TEM analysis of the transferred diamond/TC4 interface before and after dry sliding.**
Cross-sectional TEM images, high-resolution TEM images and corresponding elemental mapping results of the transferred diamond coating on TC4 titanium alloy before and after dry sliding for 4 and 8 h. The TEM images show a continuous multilayer architecture composed of the TC4 substrate, sol-gel-derived TiO2 interlayer, embedded TiO2 nanorod region and transferred polycrystalline diamond film. After dry sliding for 4 and 8 h, the transferred diamond film remains tightly attached to the TC4 substrate through the TiO2-based interlayer, indicating good interfacial stability under prolonged tribological loading. High-resolution TEM images of the sol-gel-derived TiO2 interlayer reveal that the initially amorphous interlayer gradually contains more nanocrystalline domains after dry sliding, suggesting friction-induced structural ordering or nano crystallization.

**Table S1 | Comparison of hardness and Young’s modulus of representative hard coatings prepared on titanium alloy substrates.**

|  | Preparation Method | H/Gpa | E/Gpa | H3/E2 | Reference |
| --- | --- | --- | --- | --- | --- |
| TiN | [Magnetron](https://www.sciencedirect.com/topics/engineering/magnetron) sputtering system | 29 | 350 | 0.199 | 1 |
| TiN | powder immersion reaction-assisted coating | 11 | 293 |  | 2 |
|  | electron beam plasma-assisted physical vapor deposition | 22 | 426 | 0.058 |  |
| TiB2/Cr | magnetron sputtering | 30.3 | 327.9 | 0.259 | 3 |
| DLC | direct current discharge | 12.8 | 133 | 0.119 | 4 |
| Si-DLC | plasma-based ion implantation | 30.1 | 200.1 | 0.751 | 5 |
| TiO2 | Plasma electrolytic oxidation | 3.9 | 146 | 0.003 | 6 |
| Al2O3-TiO2 | Cold Spraying and Plasma Electrolytic Oxidation | 3 | 57 | 0.008 | 7 |
| TiO2 | laser cladding | 7.6 | 136.4 | 0.024 | 8 |
| TiO2Al2O3 | low-temperature aluminizing process | 10.36 | 248 | 0.018 | 9 |
| Diamond | MPCVD | 45 | 350 | 0.744 | 10 |
| This work | Diamond transfer | 69.5 | 450 | 1.658 |  |

**Table S2 | Comparison of processing temperature and corrosion current density of representative corrosion-resistant coatings on titanium alloy substrates.**

|  | **Preparation Method** | **Temperature**  **(℃)** | **i-corr**  **(nA/cm2)** | **Reference** |
| --- | --- | --- | --- | --- |
| TiO2 | Micro Arc Oxidation in Molten Salt | 280 | 160 | 11 |
| TiO2/（PTEE+graphite） | Micro-arc oxidation | 260 | 79.2 | 12 |
| TiO2 | Electrochemical Anodization | 27 | 120 | 13 |
| TiO2 | Electrochemical Anodization | 550 | 40 |  |
| SiO2/ZrO2 | Electrophoretic deposition | 27 | 56 | 14 |
| ZrO2/TiO2 | Electrophoretic deposition | 27 | 16 |  |
| TiO2/Al2O3 | Thermal oxidation | 700 | 386 | 15 |
| TiO2/Al2O3/V2O3 | Plasma oxidation | 600 | 25 | 16 |
| TiN | Plasma Nitrided | 800 | 276 | 17 |
| TiO2 | Sol-gel | 200 | 3.2 | 18 |
| SiO2 | Sol-gel | 200 | 4.6 |  |
| ZrO2 | Pulsed Laser Deposition | 800 | 33.4 | 19 |
| Ta2O5 | Magnetron Sputtering | 500 | 50 | 20 |
| Diamond | MPCVD | 780 | 1.2 | 21 |
| This Work | Diamond Transfer | 200 | 0.88 |  |

References:

1. Herrera-Jimenez, E. J. *et al.* Fracture mechanism of TiN coatings on Ti-6Al-4V substrates: Role of interfaces and of the residual stress depth profile. *Surf. Coat. Technol.* **426**, (2021).

2. Wu, S., Wu, S., Zhang, G. & Zhang, W. Hardness and Elastic Modulus of Titanium Nitride Coatings Prepared by Pirac Method. *Surf. Rev. Lett.* **25**, (2018).

3. Wu, B. *et al.* Designing TiB2/Cr multilayer coatings on Ti6Al4V substrate for optimized wear resistance. *Surf. Sci. Technol.* **2**, (2024).

4. Dorner, A. *et al.* Diamond-like carbon-coated Ti6Al4V: influence of the coating thickness on the structure and the abrasive wear resistance. *Wear* **249**, 489–497 (2001).

5. Moolsradoo, N. & Watanabe, S. THE INFLUENCE OF SILICON ELEMENT-ADDED DLC FILM ON Ti-6Al-4V. *Suranaree J. Sci. Technol.* **30**, (2023).

6. Madhuri, D. *et al.* Flat Absorber Black PEO coatings on Ti6Al4V for spacecraft thermal control application. *Ceramics International* **48**, 35906–35914 (2022).

7. Shao, M., Wang, W., Yang, H., Zhang, X. & He, X. Preparation of Wear-Resistant Coating on Ti6Al4V Alloy by Cold Spraying and Plasma Electrolytic Oxidation. *Coatings* **11**, (2021).

8. Song, L., Xiao, H., Ye, J. & Li, S. Direct laser cladding of layer-band-free ultrafine Ti6Al4V alloy. *Surf. Coat. Technol.* **307**, 761–771 (2016).

9. Doleker, K. M., Yener, T., Erdogan, A., Yılmaz, F. & Efe, G. C. Effect of Si and Cr on formation of aluminide coatings on Ti6Al4V alloy by low temperature aluminizing: Wear and oxidation behavior. *Surface and Coatings Technology* **509**, 132207 (2025).

10. Wang, J. *et al.* Tribological, anti-corrosive properties and biocompatibility of the micro- and nano-crystalline diamond coated Ti6Al4V. *Surf. Coat. Technol.* **258**, 1032–1038 (2014).

11. Sobolev, A., Wolicki, I., Kossenko, A., Zinigrad, M. & Borodianskiy, K. Coating Formation on Ti-6Al-4V Alloy by Micro Arc Oxidation in Molten Salt. *Materials (Basel)* **11**, 1611 (2018).

12. Study on corrosion resistance of TC4 titanium alloy micro‐arc oxidation/(PTFE + graphite) composite coating. https://doi.org/10.1111/ijac.13891 doi:10.1111/ijac.13891.

13. Moradi, A., Tajalli, S., Behjat, A., Saboori, A. & Iuliano, L. Surface Engineering of EB-PBF Ti6Al4V via Anodization: Multifunctional Improvements Through TiO2 Nanotube Arrays. *Coatings* **15**, 993 (2025).

14. Chellappa, M. & Vijayalakshmi, U. Improved corrosion resistant and mechanical behavior of distinct composite coatings (silica/titania/zirconia) on Ti–6Al–4V deposited by EPD. *Journal of Asian Ceramic Societies* **5**, 326–333 (2017).

15. Cao, L., Wan, Y., Yang, S. & Pu, J. The Tribocorrosion and Corrosion Properties of Thermally Oxidized Ti6Al4V Alloy in 0.9 wt.% NaCl Physiological Saline. *Coatings* **8**, 285 (2018).

16. Velazquez-Torres, N. *et al.* Corrosion Resistance of a Plasma-Oxidized Ti6Al4V Alloy for Dental Applications. *Coatings* **11**, 1136 (2021).

17. Dwivedi, P., Rane, R., Jhala, G., Ghoroi, C. & Joseph, A. Electrochemical Corrosion Investigation of Plasma Nitrided Ti-6Al-4V Alloy in Different Simulated Solution. *J. of Materi Eng and Perform* **34**, 28120–28133 (2025).

18. Both, J., Szabó, G. S., Ciorîță, A. & Mureșan, L. M. Silver Linings: Electrochemical Characterization of TiO2 Sol-Gel Coating on Ti6Al4V with AgNO3 for Antibacterial Excellence. *Coatings* **14**, 1532 (2024).

19. Kedia, S., Soundharraj, P. & Nilaya, J. P. Effect of zirconia coating on Ti6Al4V at elevated substrate temperature on its wear, corrosion and hemocompatibility properties. *Ceramics International* **50**, 27102–27110 (2024).

20. Nikolova, M. P. & Tzvetkov, I. Influence of Deposition Temperature on Microstructure and Properties of Tantalum Oxide Sputtered Coatings. *Materials* **18**, 1895 (2025).

21. Liu, Z. *et al.* Corrosion resistance of diamond films with different grain sizes. *Diamond and Related Materials* **146**, 111162 (2024).
